# Supplementary material
Source: publisher figshare collection journal article supplement (https://tandf.figshare.com/ndownloader/files/22401441)
Supplement: Supplementary file 1 [file 22401441]

**Online appendix:** Average Marginal Effects on National Identity, Model 5 and Model 6

|  | M5  2005  Marginal Effects | M6  2010  Marginal Effects |
| --- | --- | --- |
| Gender (female==1) | 0.21*** | 0.25*** |
|  | (0.034) | (0.033) |
| Age (years) | 0.01*** | 0.01*** |
|  | (0.0012) | (0.0011) |
| Education (Ref. below secondary) |  |  |
|  |  |  |
| Edu: secondary completed | -0.44*** | -0.47*** |
|  | (0.048) | (0.051) |
| Edu: post secondary | 0.97*** | -1.08*** |
|  | (0.056) | (0.059) |
| Occupation: (Ref: Not in labor force) | . |  |
|  | . |  |
| Occu: Blue collar and service | 0.12* | 0.03 |
|  | (0.047) | (0.046) |
| Occu: Managers | -0.34*** | -0.29*** |
|  | (0.064) | (0.063) |
| Occu: Professionals | -0.59*** | -0.37*** |
|  | (0.011) | (0.106) |
| Occu: Other white collar | -0.28*** | -0.10 |
|  | (0.058) | (0.055) |
| Occu: Owners | -0.04 | -0.20** |
|  | (0.066) | (0.066) |
| Trust in EU-institutions | -0.94*** | -0.96*** |
|  | (0.037) | (0.037) |
| Trust in National Government | -0.07 | -0.19*** |
|  | (0.038) | (0.039) |
| Political identification (right) | -0.05 | -0.001 |
|  | (0.042) | (0.040) |
| GDP per capita (USD) | -0.004 | -0.02** |
|  | (0.0098) | (0.008) |
| Unemployment rate (%) | -0.03 | -0.03 |
|  | (0.021) | (0.027) |
| Debt (% of GDP) | 0.0005 | -0.01* |
|  | (0.0034) | (0.0025) |
| Years since EU-entry | 0.000 | -0.01 |
|  | (0.0054) | (0.0043) |
| Eurozone (dummy) | 0.036 | -0.32** |
|  | (0.18) | (0.121) |
| Change in GDP (%) (M5: 2002-2004; M6: 2007-2009) | 0.05* | -0.06*** |
|  | (0.018) | (0.016) |
| Change in gross debt (%) (M5: 2002-2005; M6: 2007-2009) | 0.0019 | 0.02*** |
|  | (0.0094) | (0.0052) |
| Change in unemployment (%) (M5: 2002-2004; M6: 2007-2009) | -0.035 | -0.07 |
|  | (0.062) | (0.044) |
|  |  |  |
| Countries | 27 | 27 |
| Observations | 17214 | 17502 |
